# Supplementary material
Source: MDPI journal article supplement (https://www.mdpi.com/2073-4395/12/7/1653)

**Figure S1**

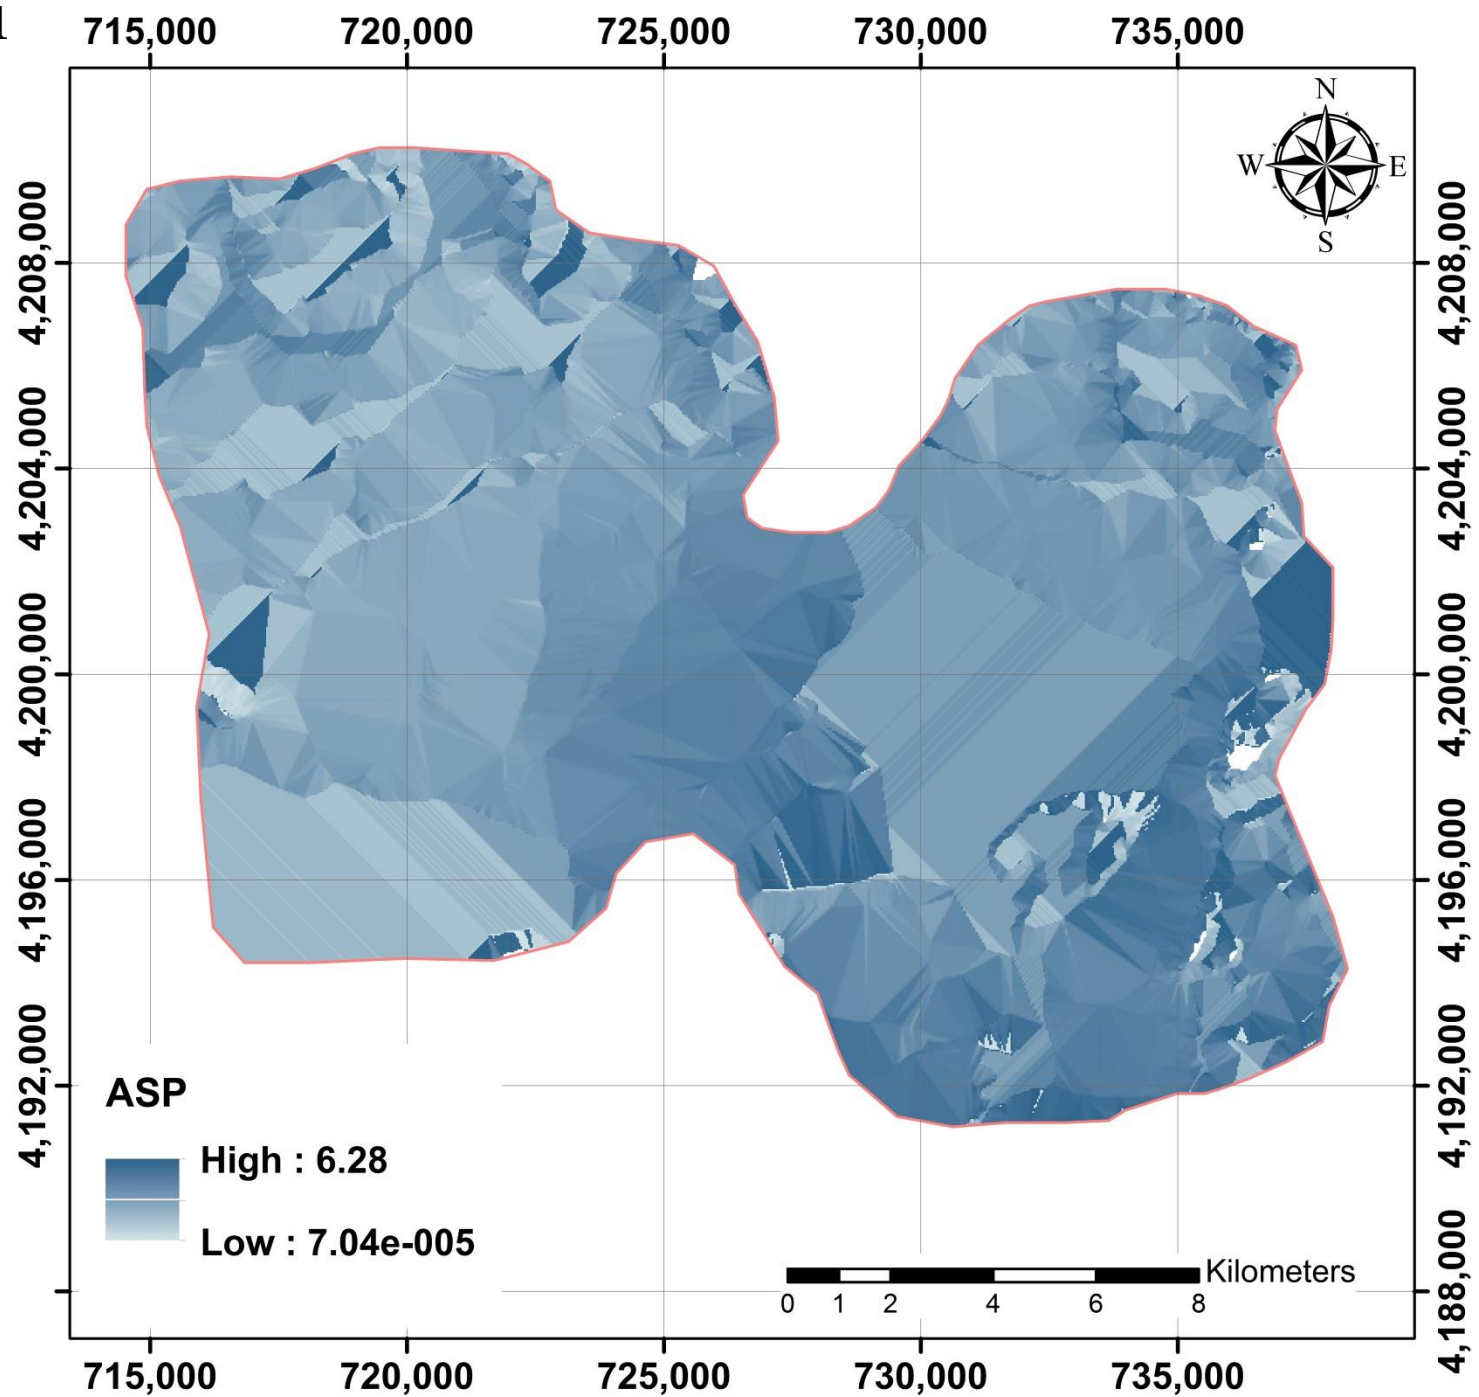

Figure S2

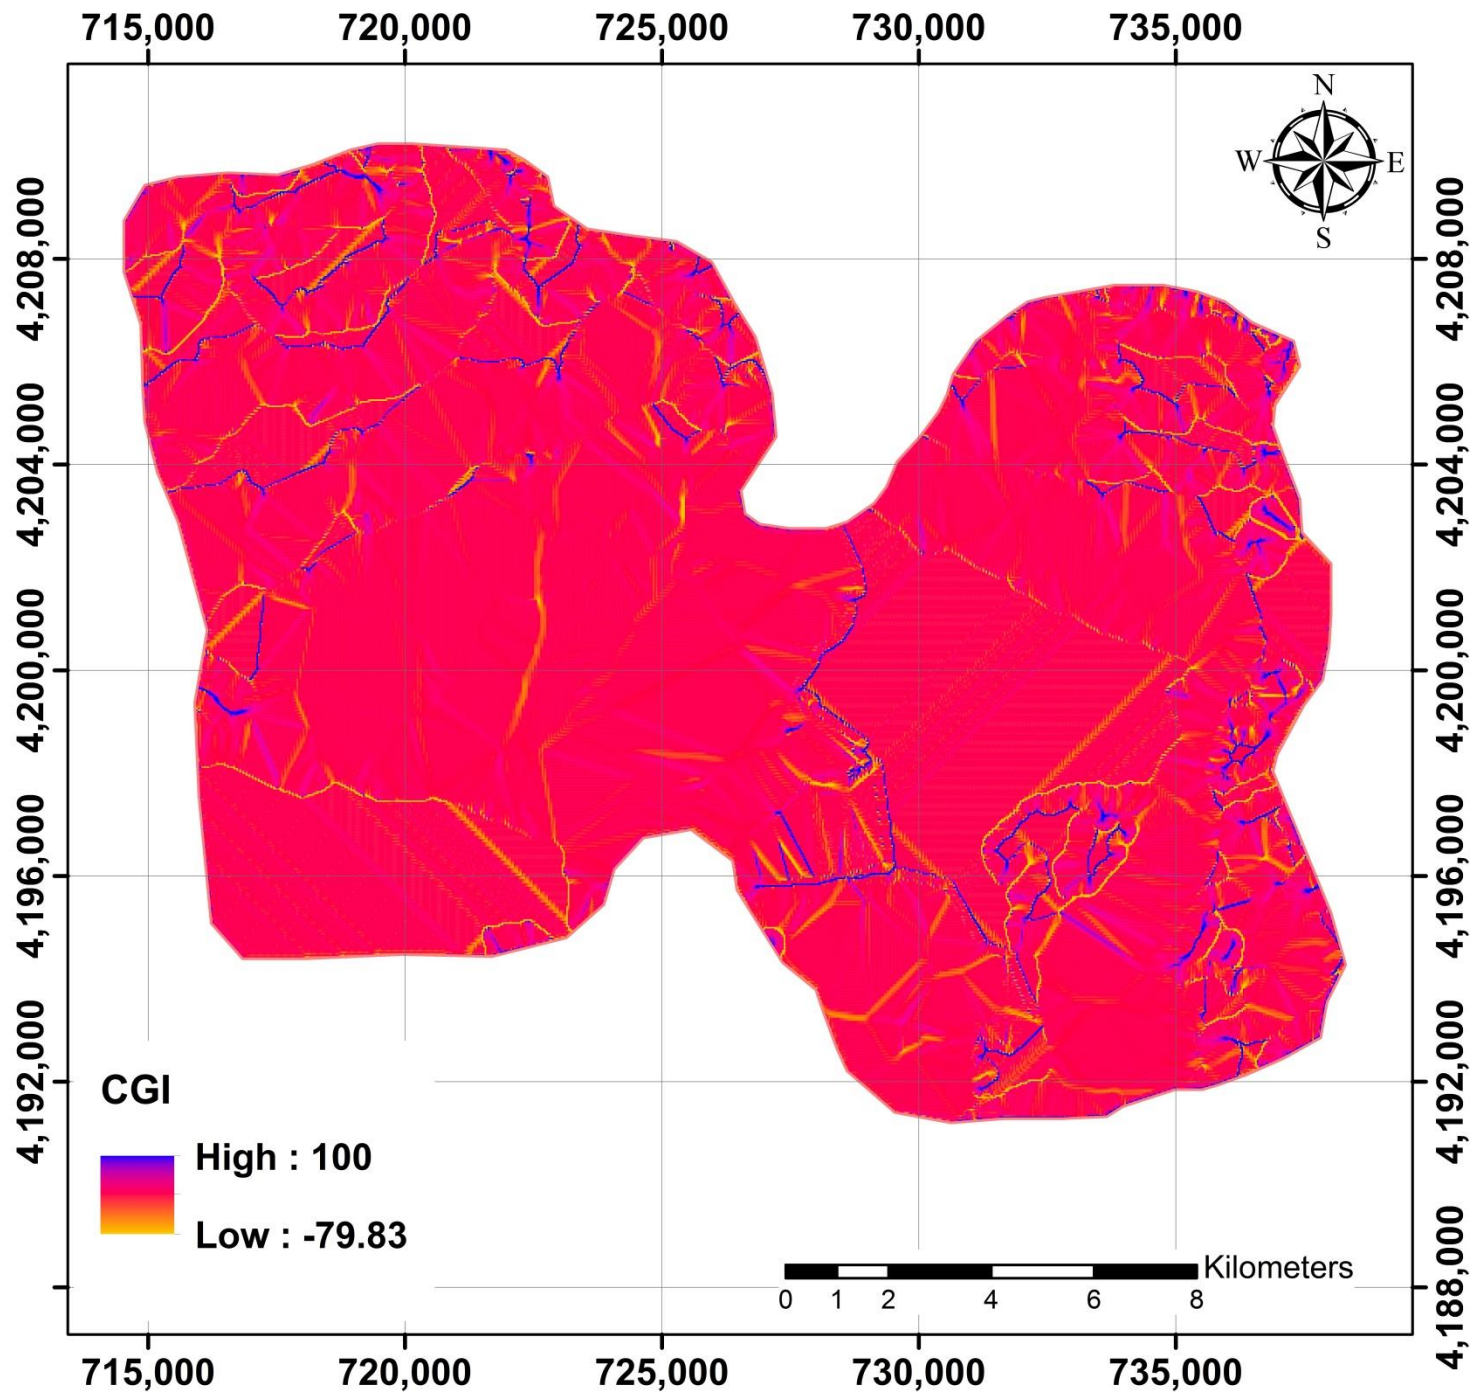

Figure S3

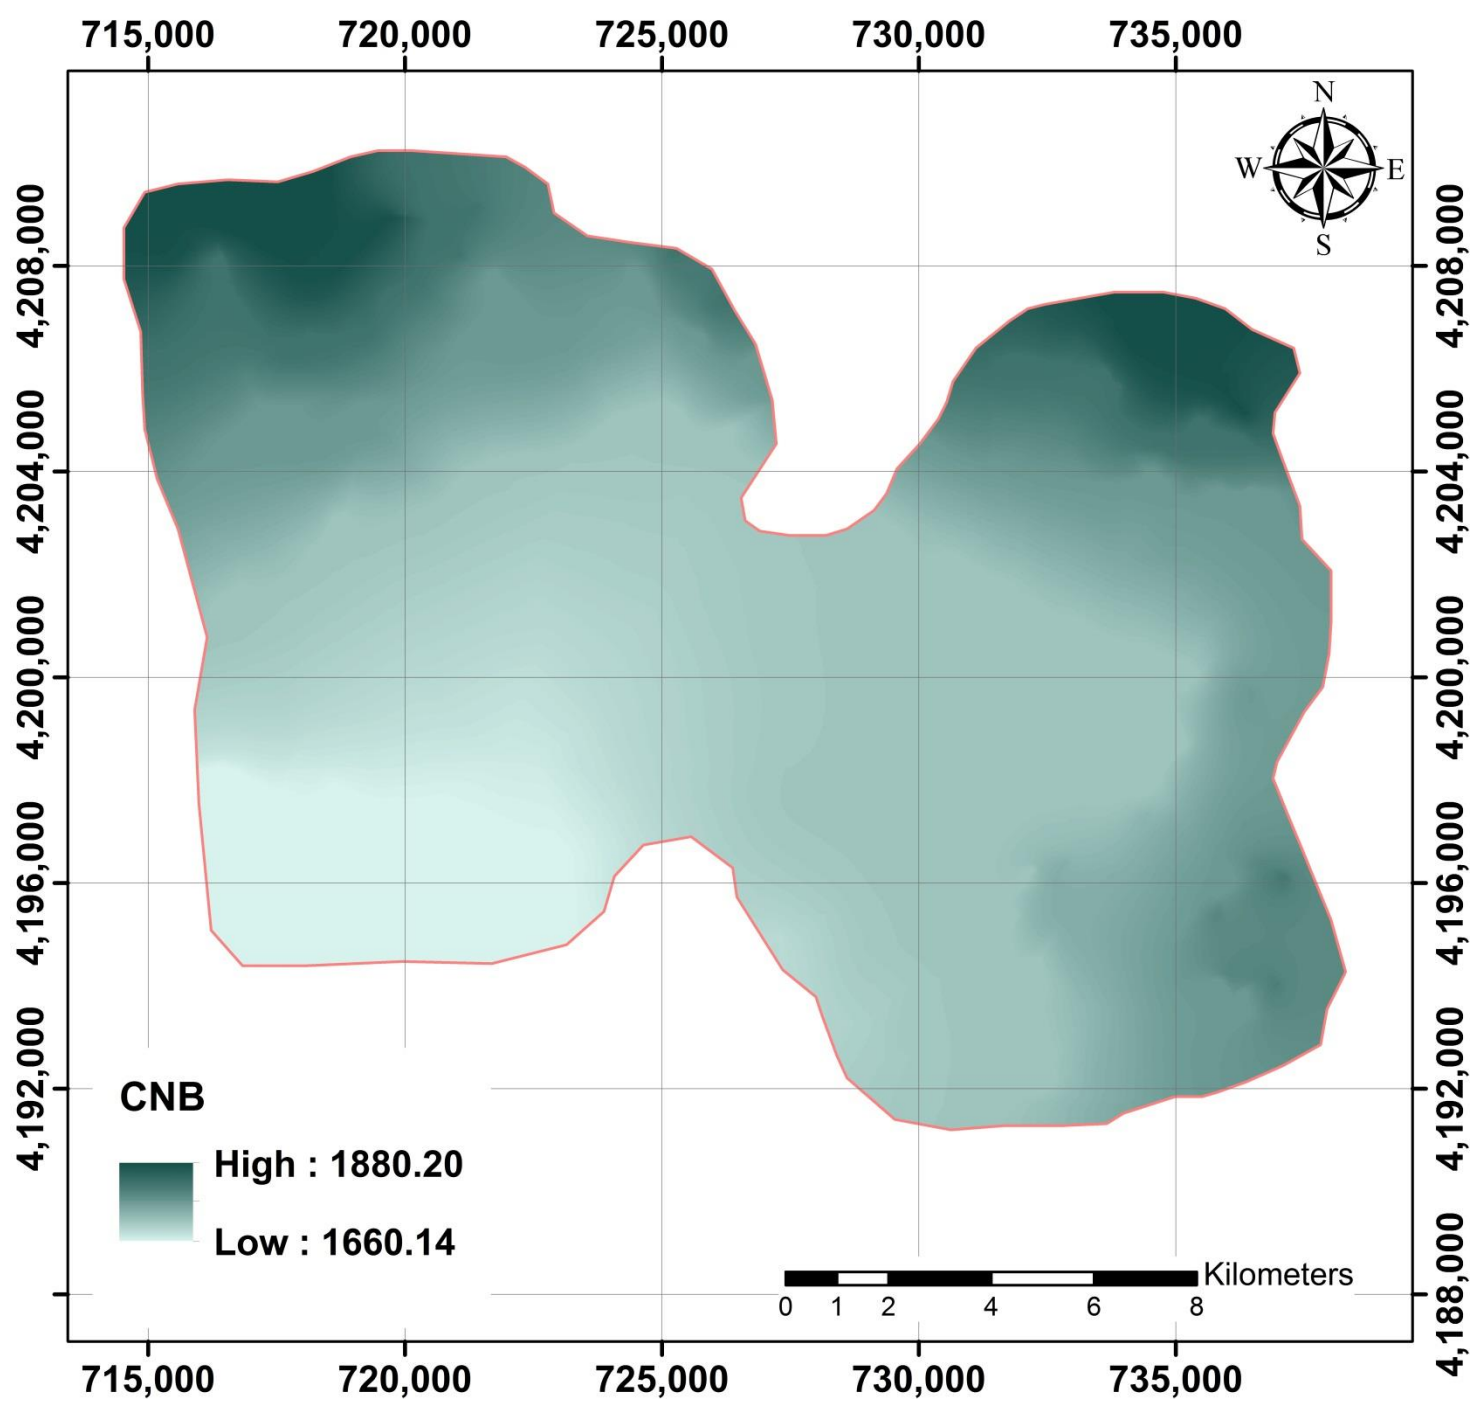



Figure S4

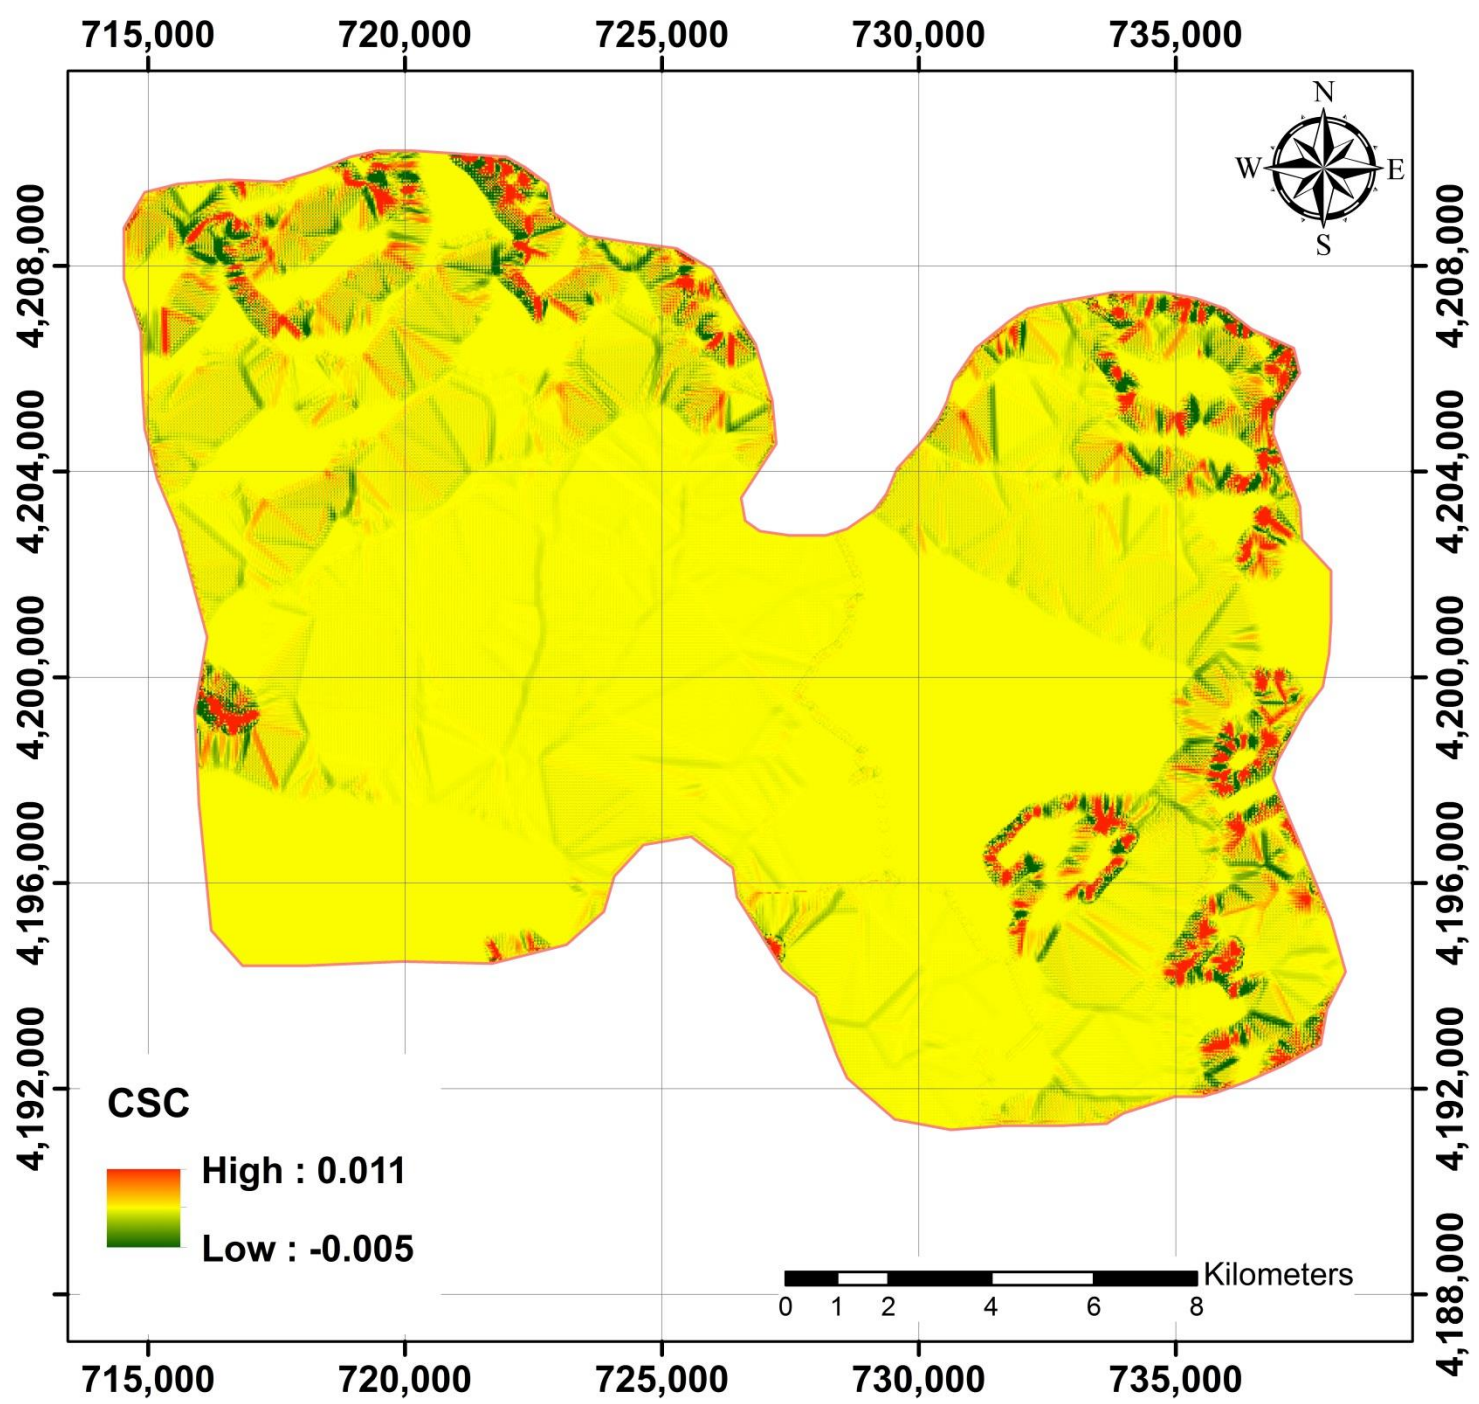

**Figure S5**

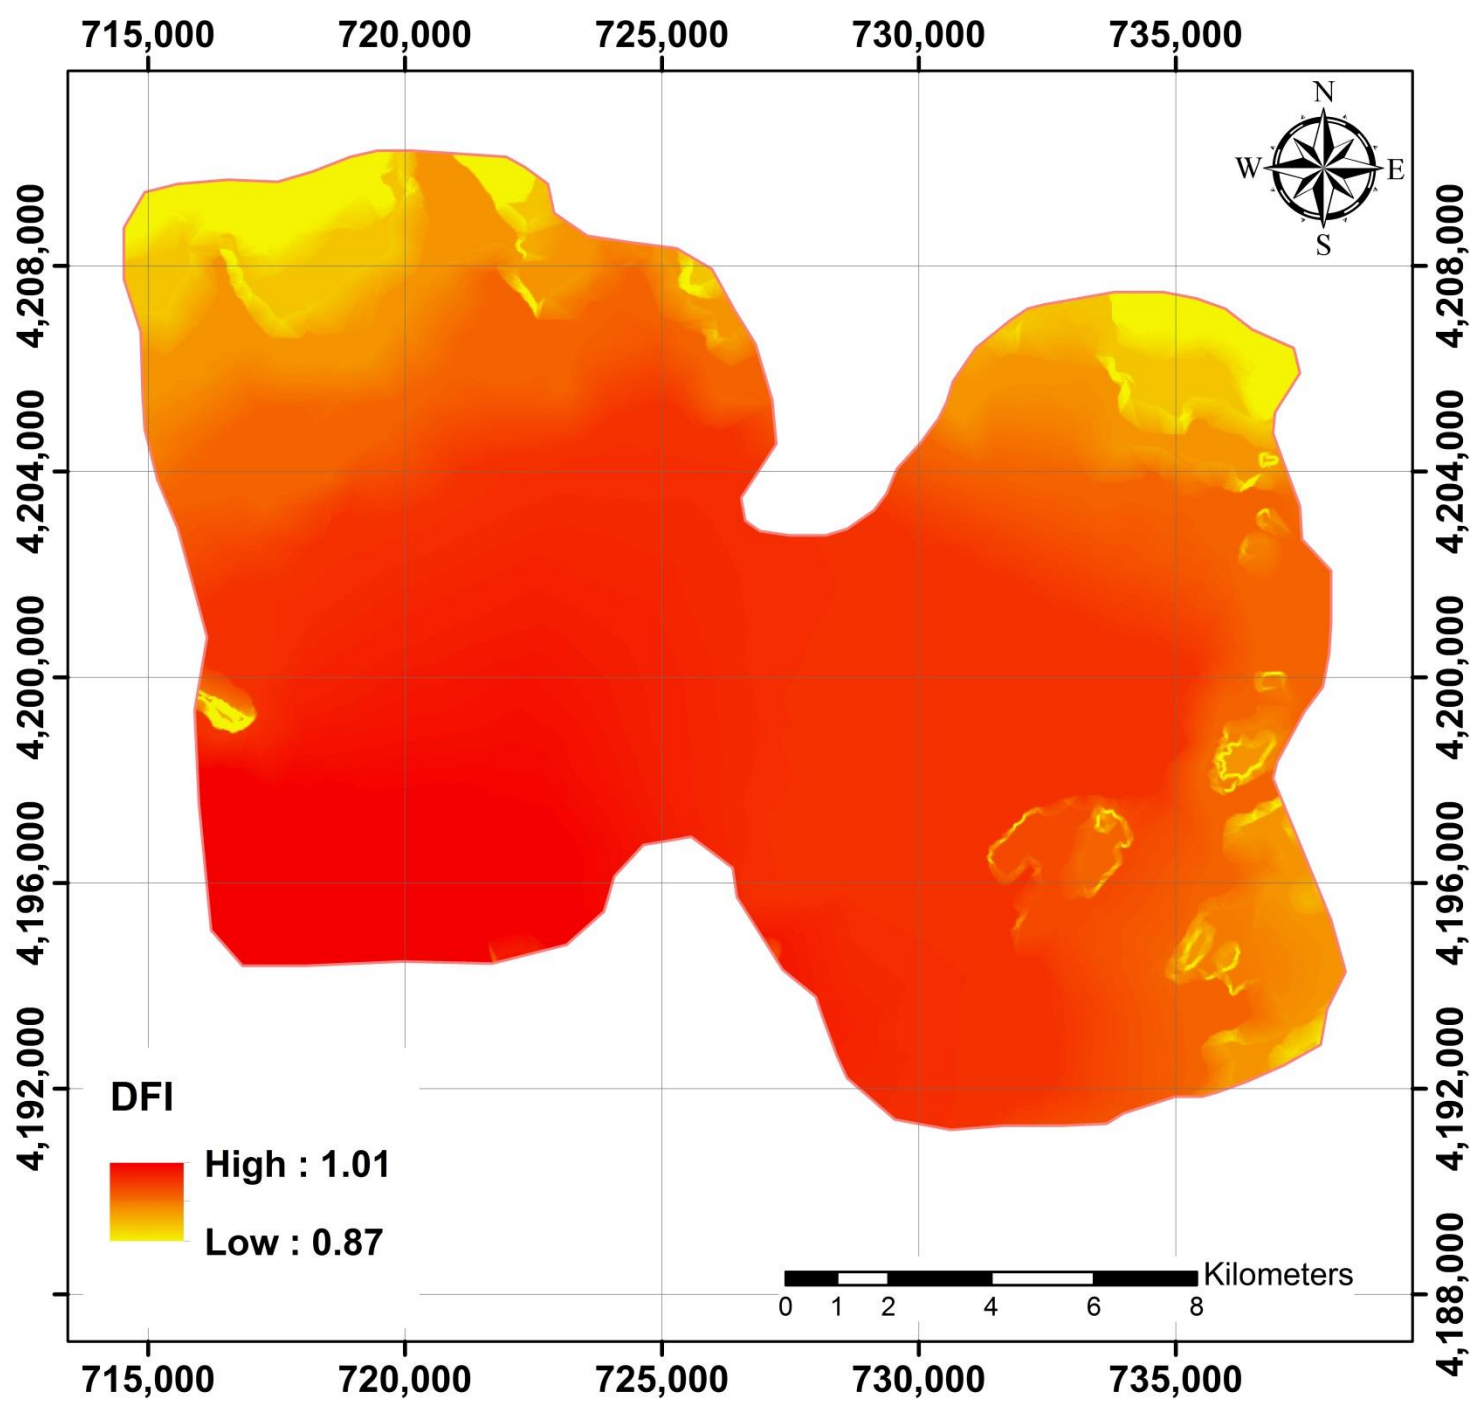

**Figure S6**

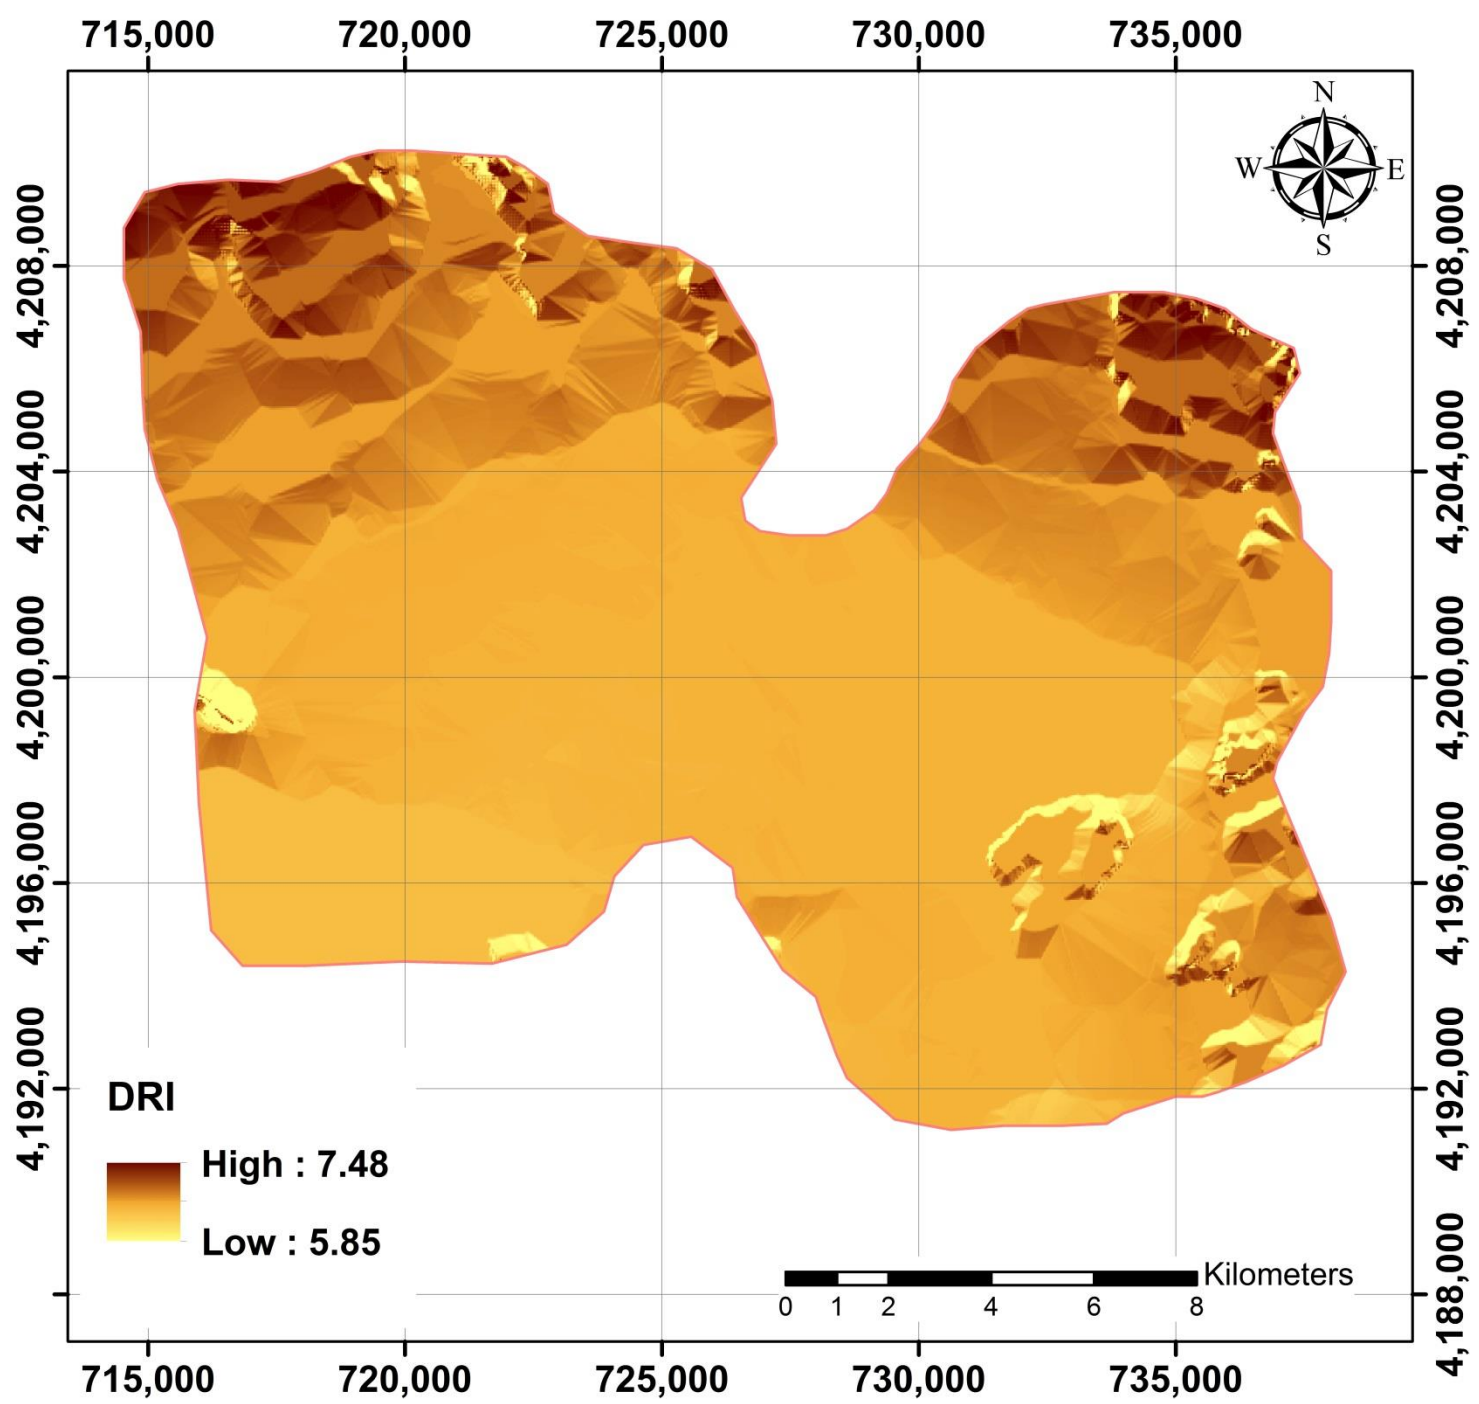

**Figure S7**

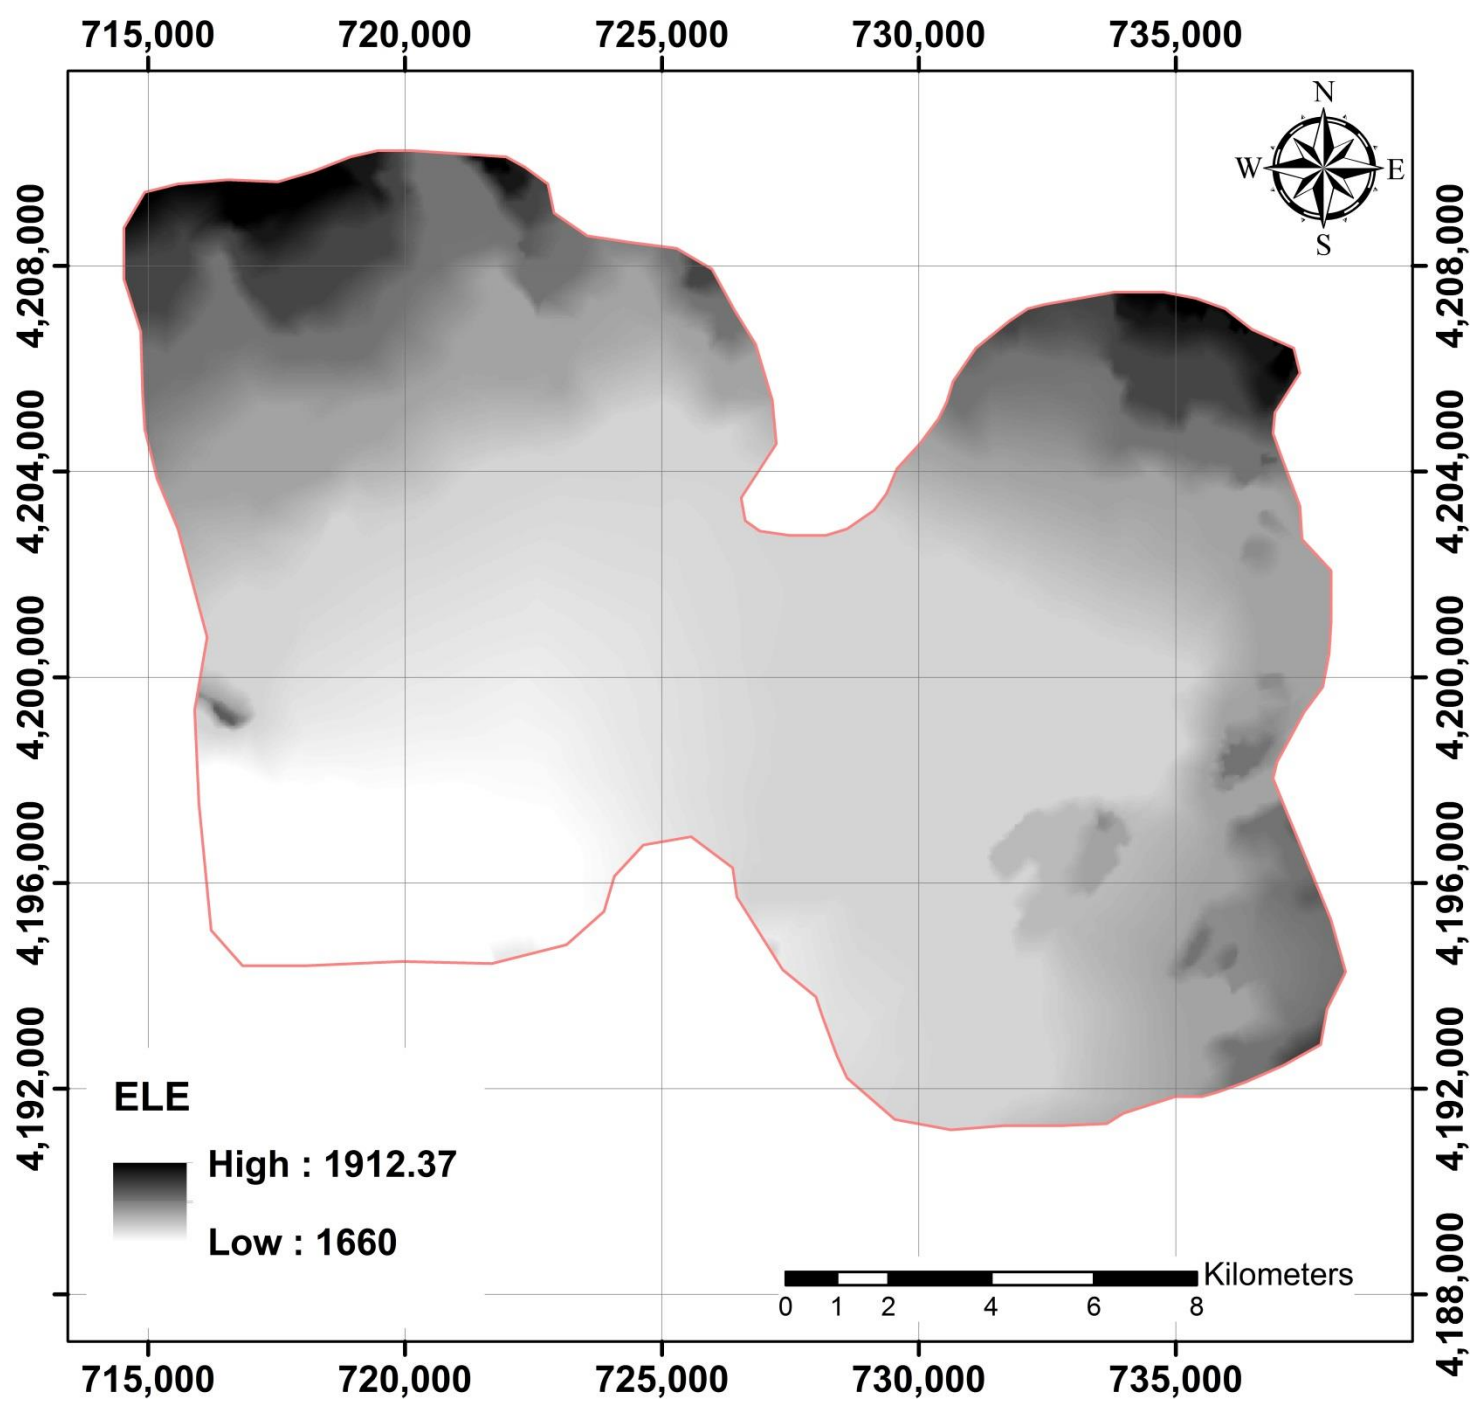



**Figure S8**

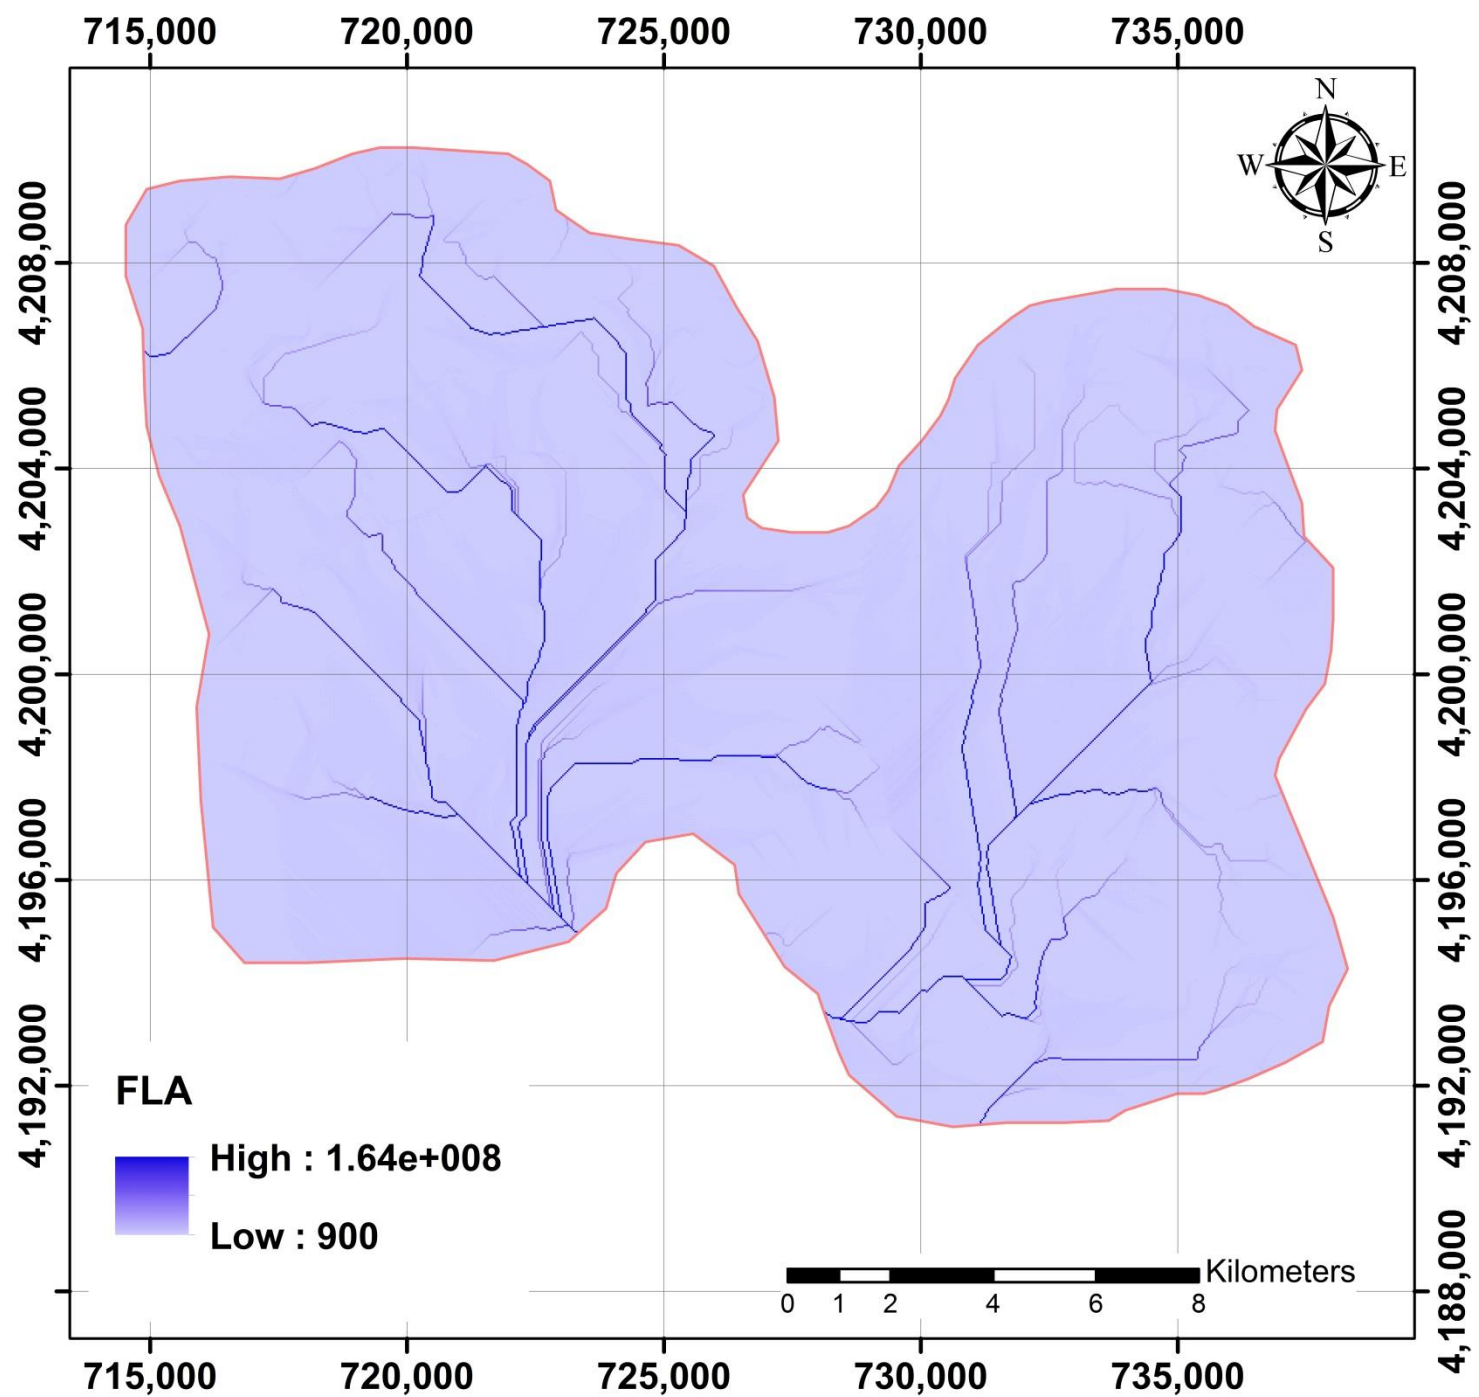



Figure S9

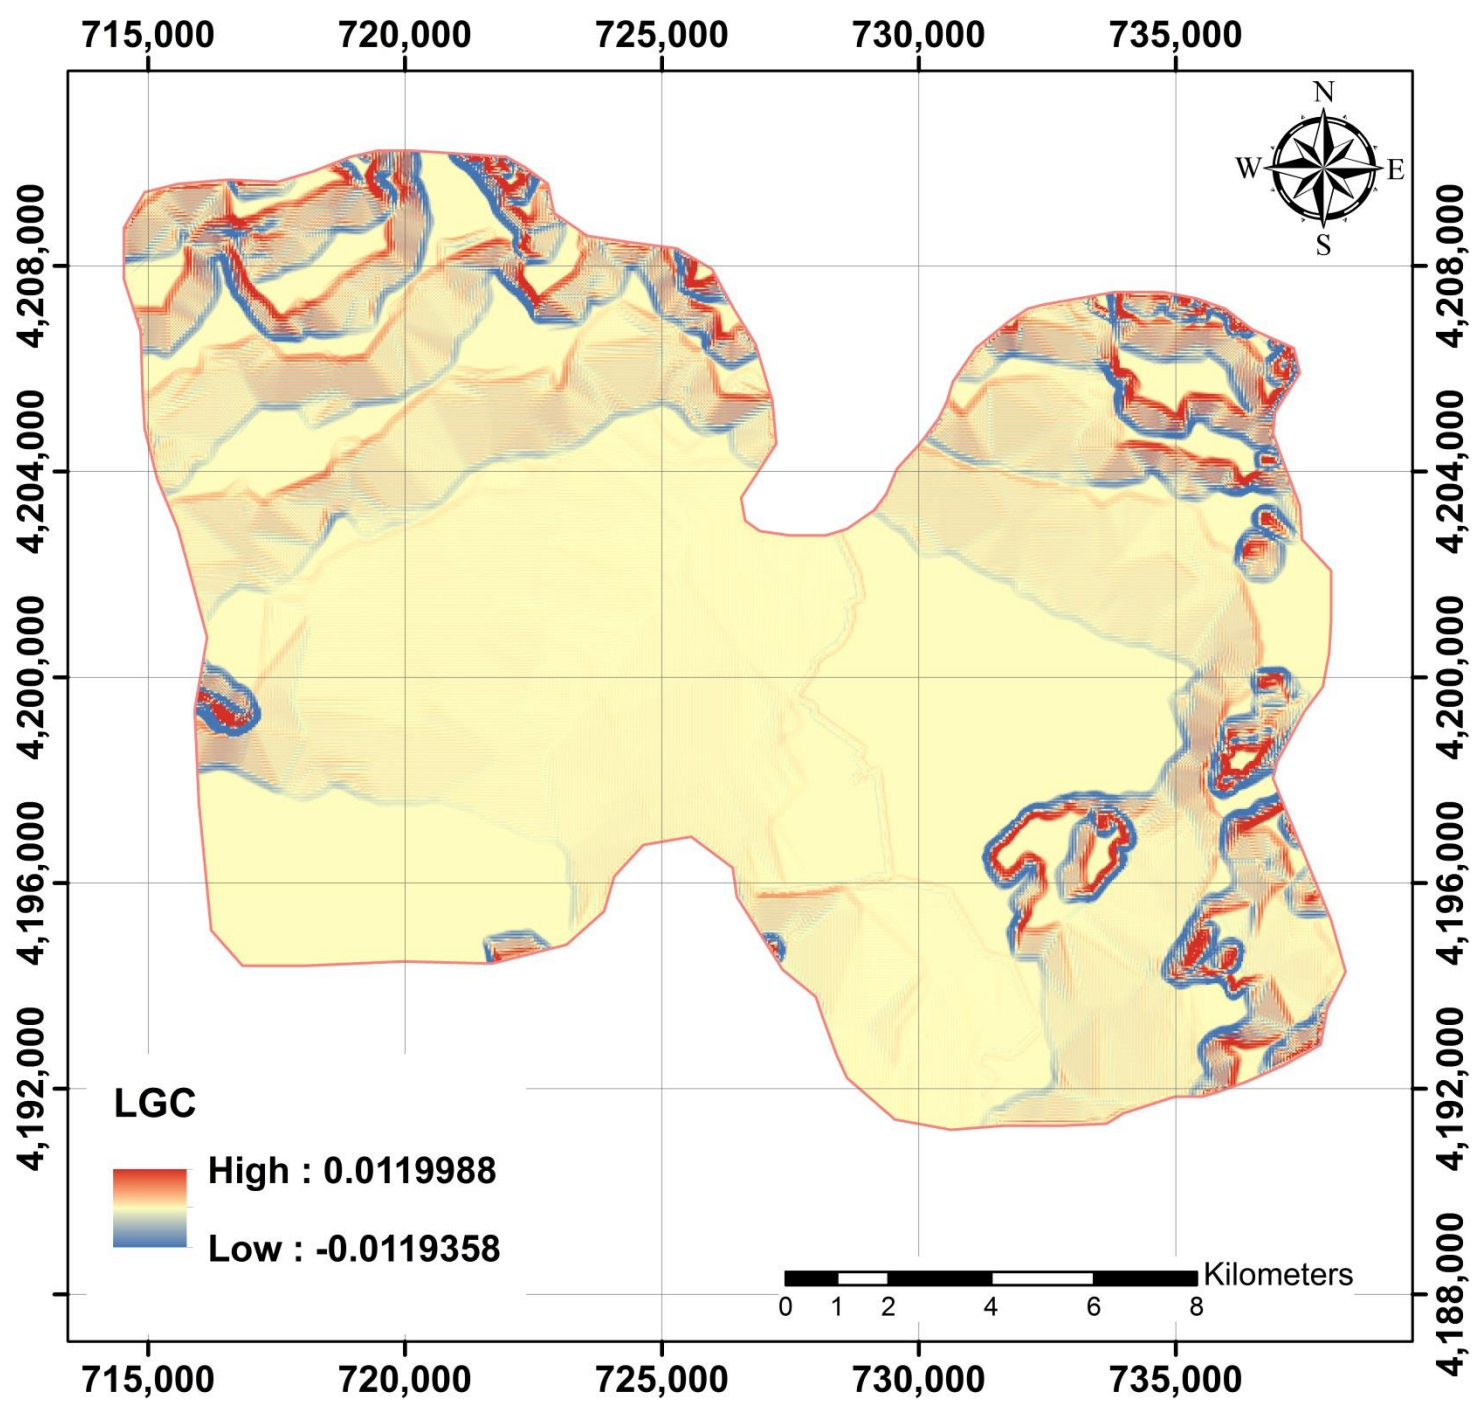

**Figure S10**

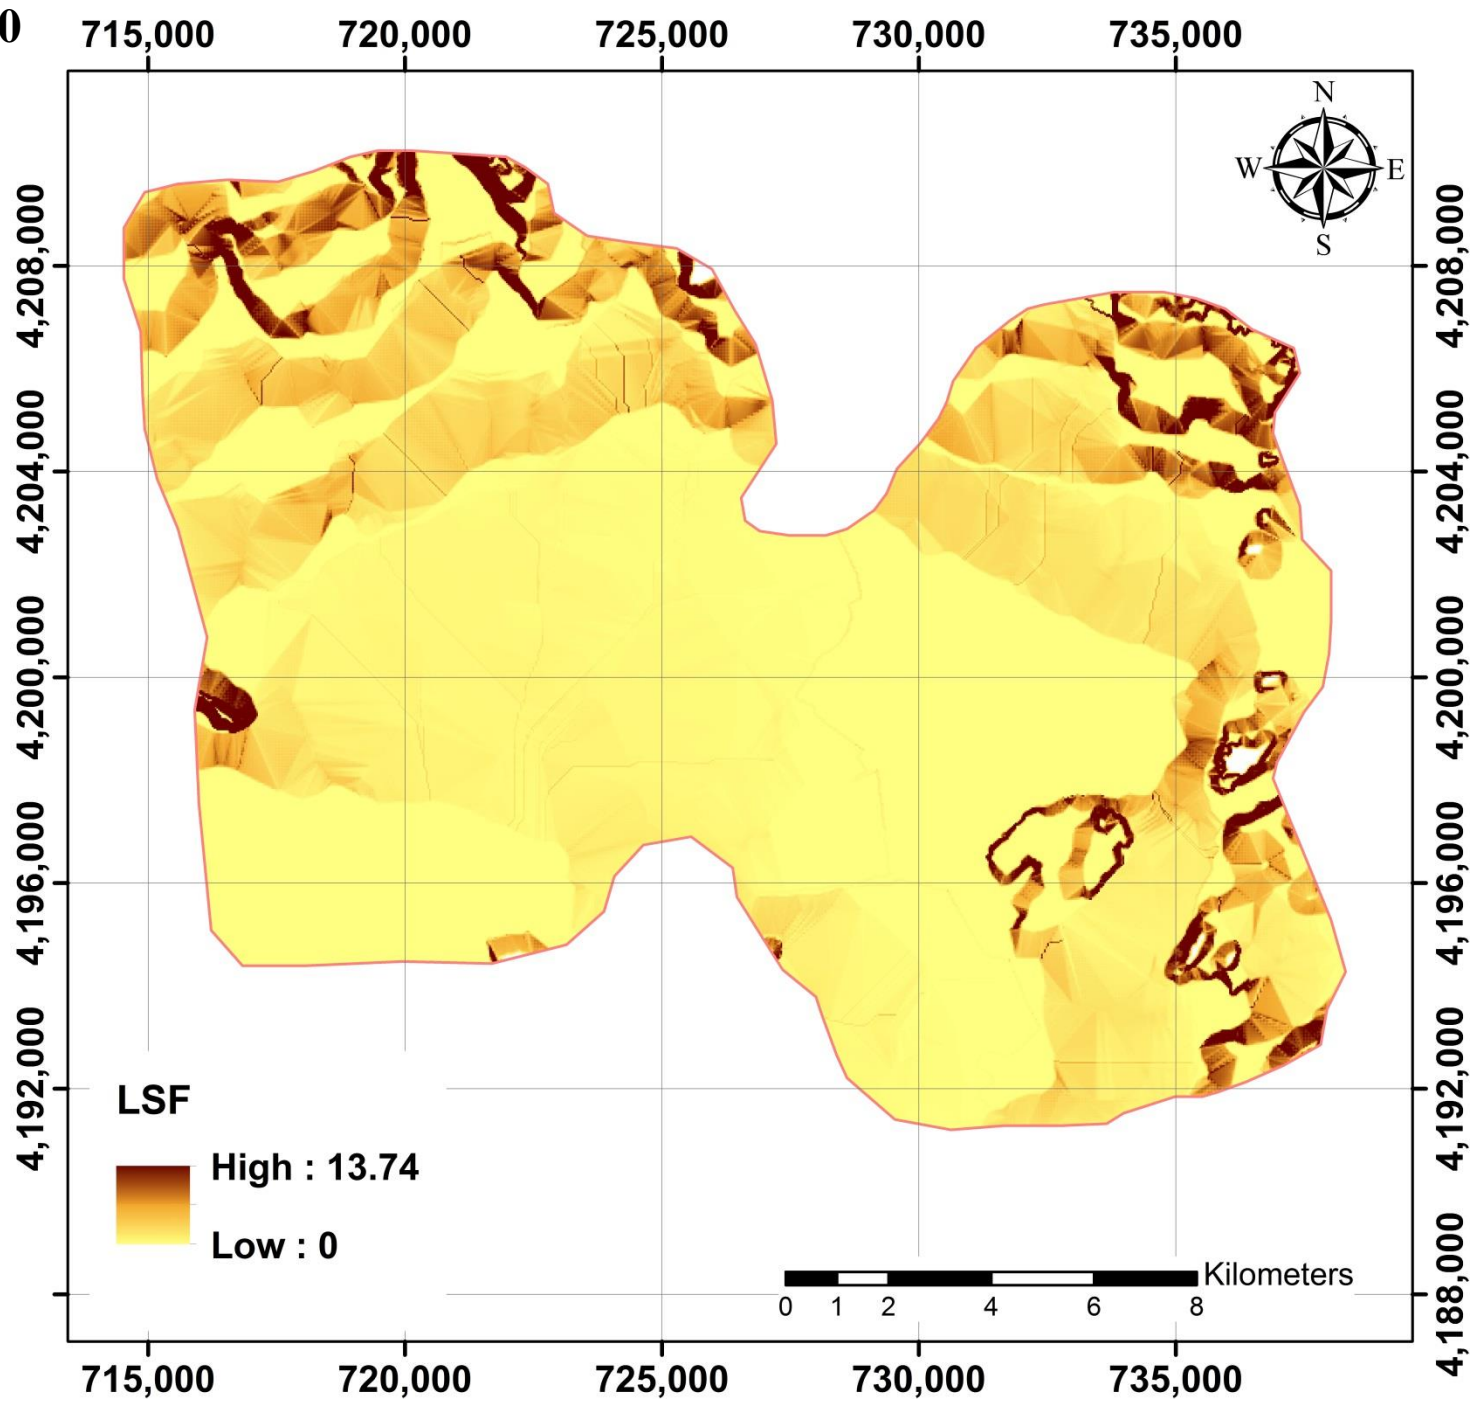

**Figure S11**

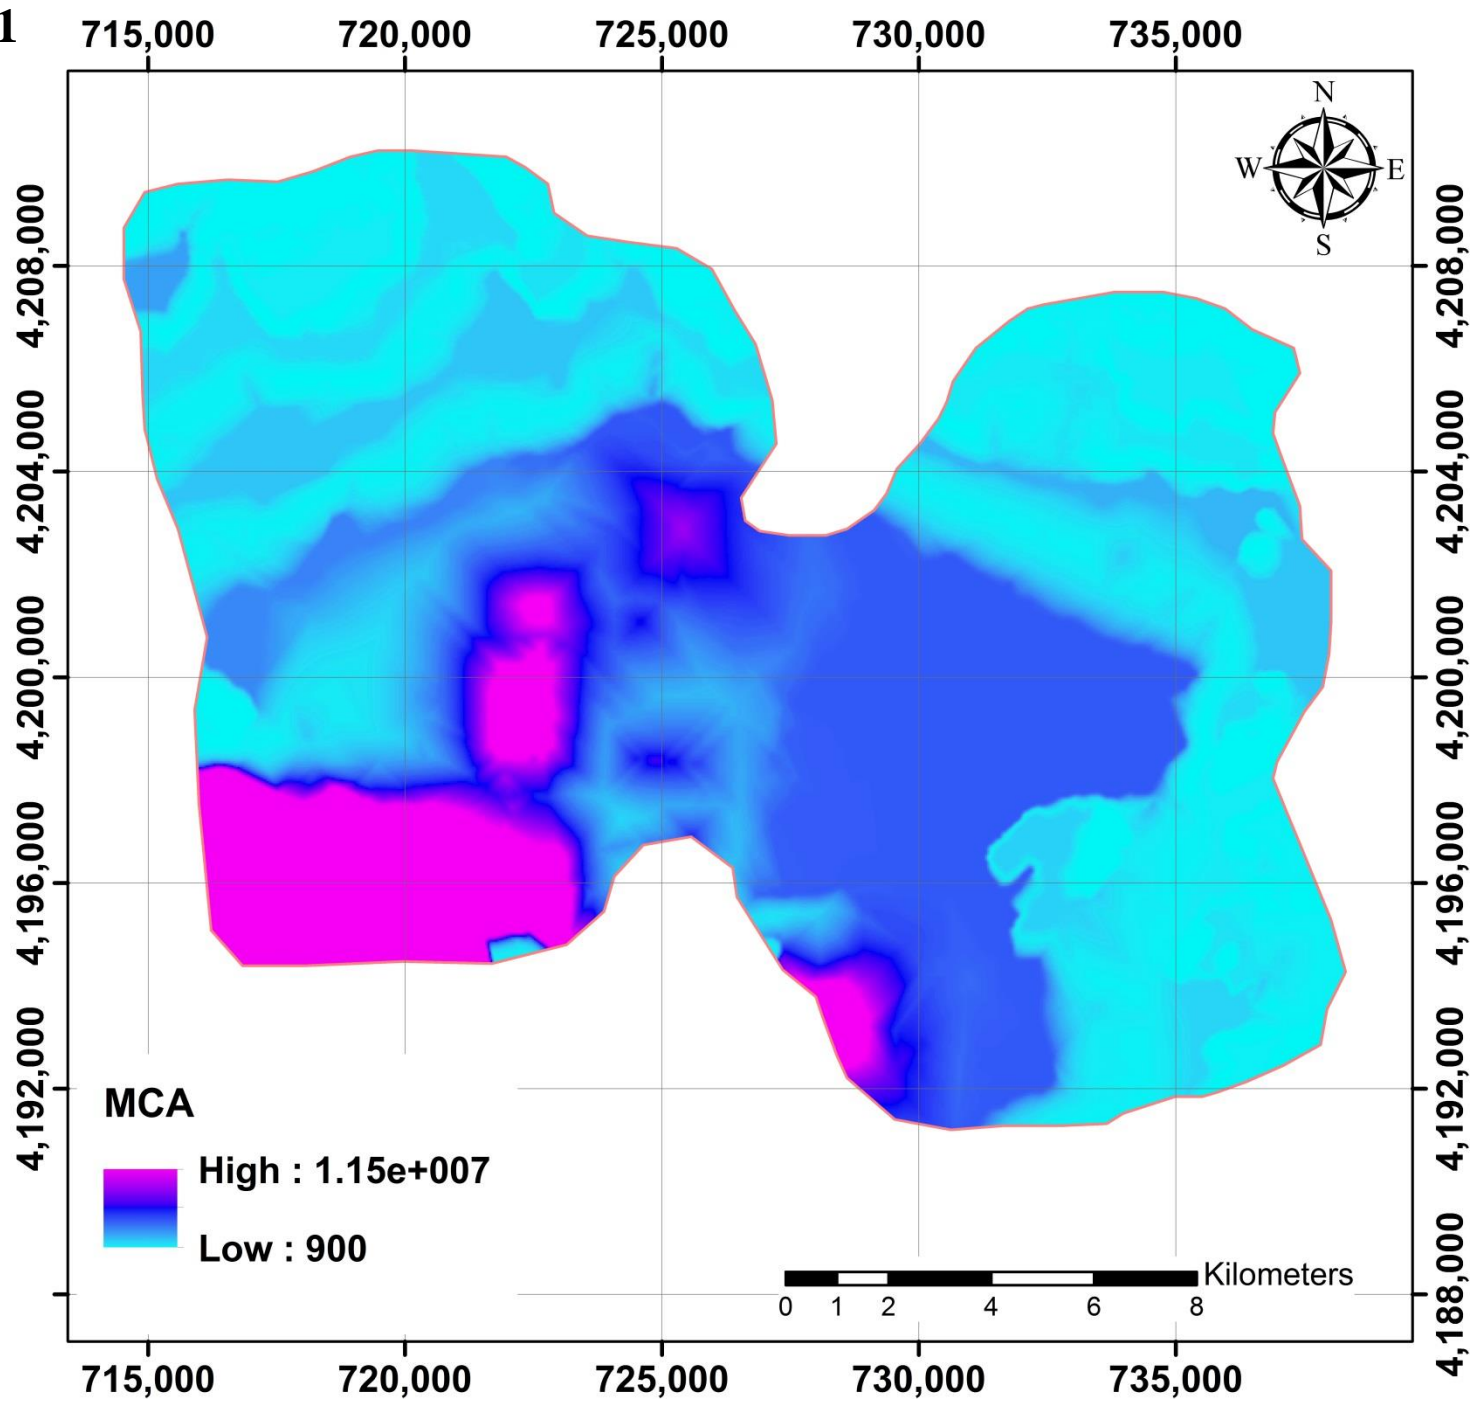



Figure S12

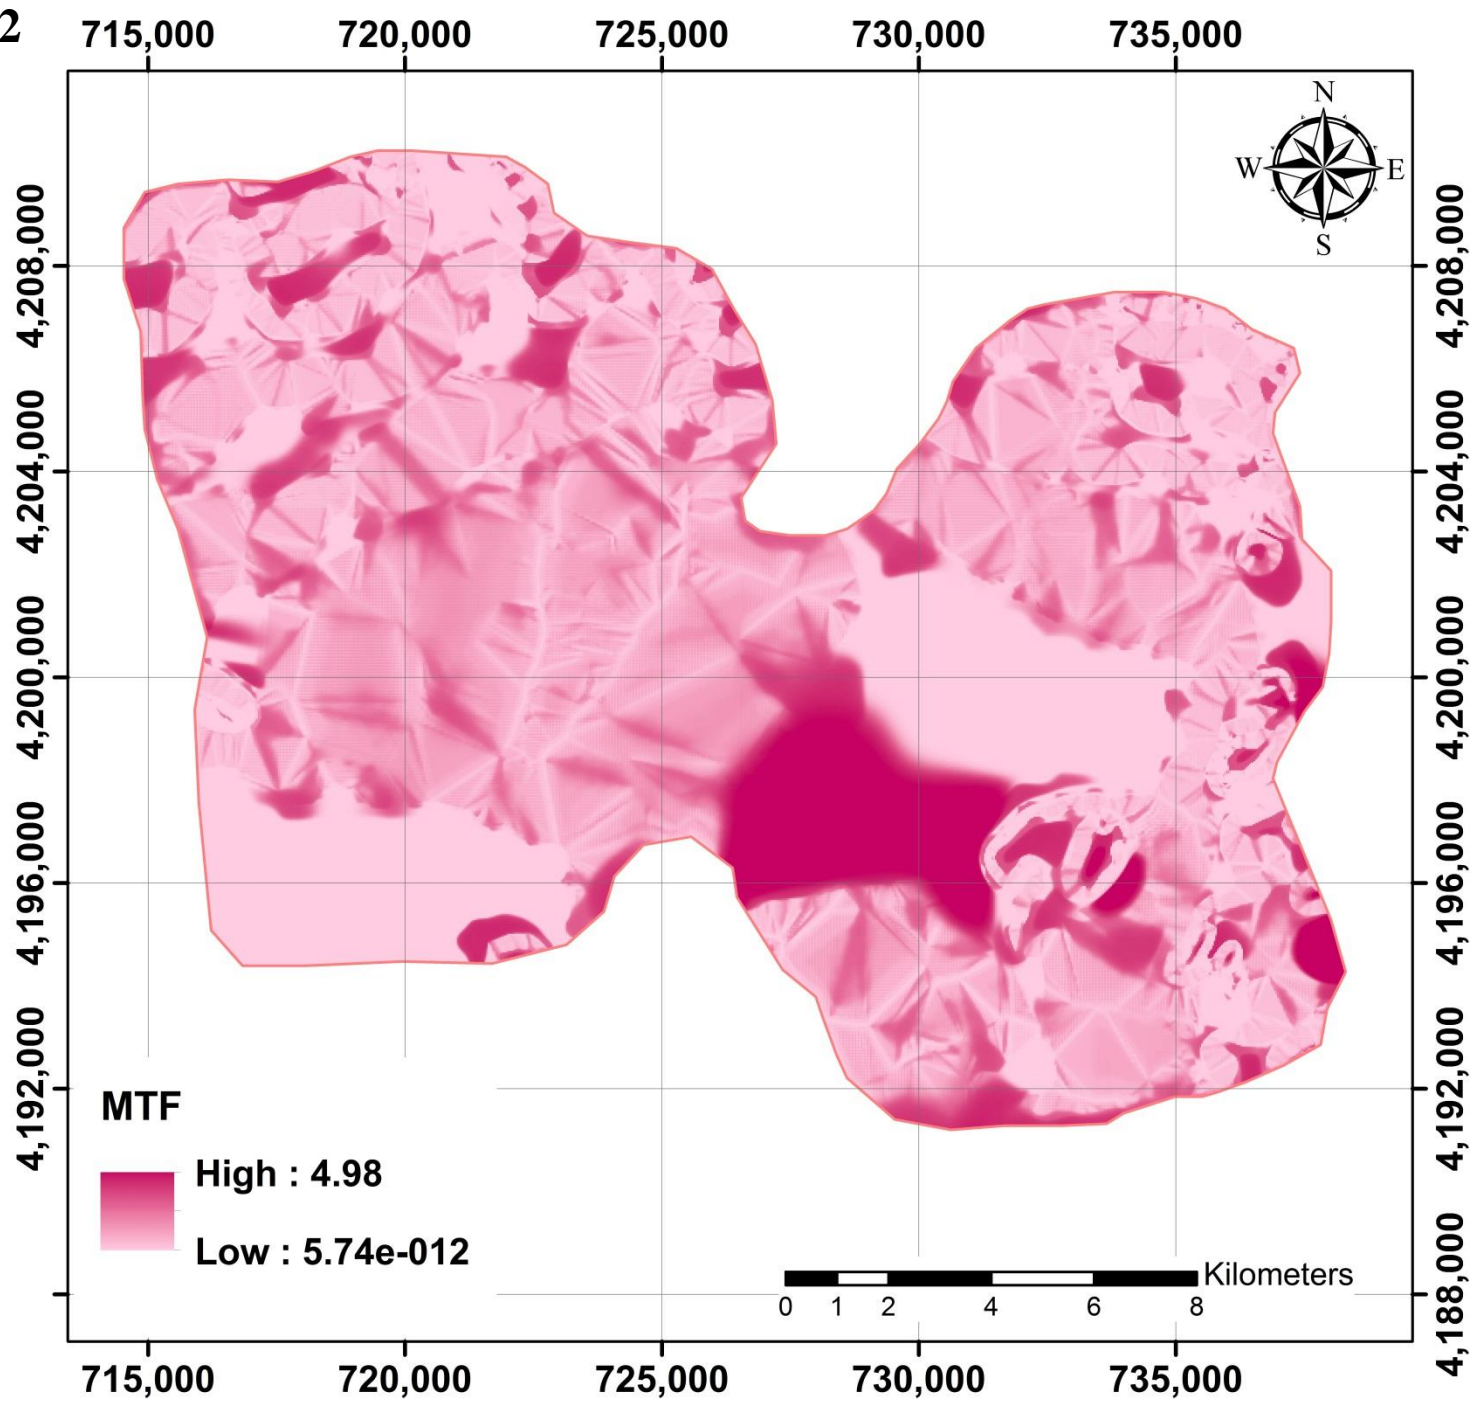



Figure S13

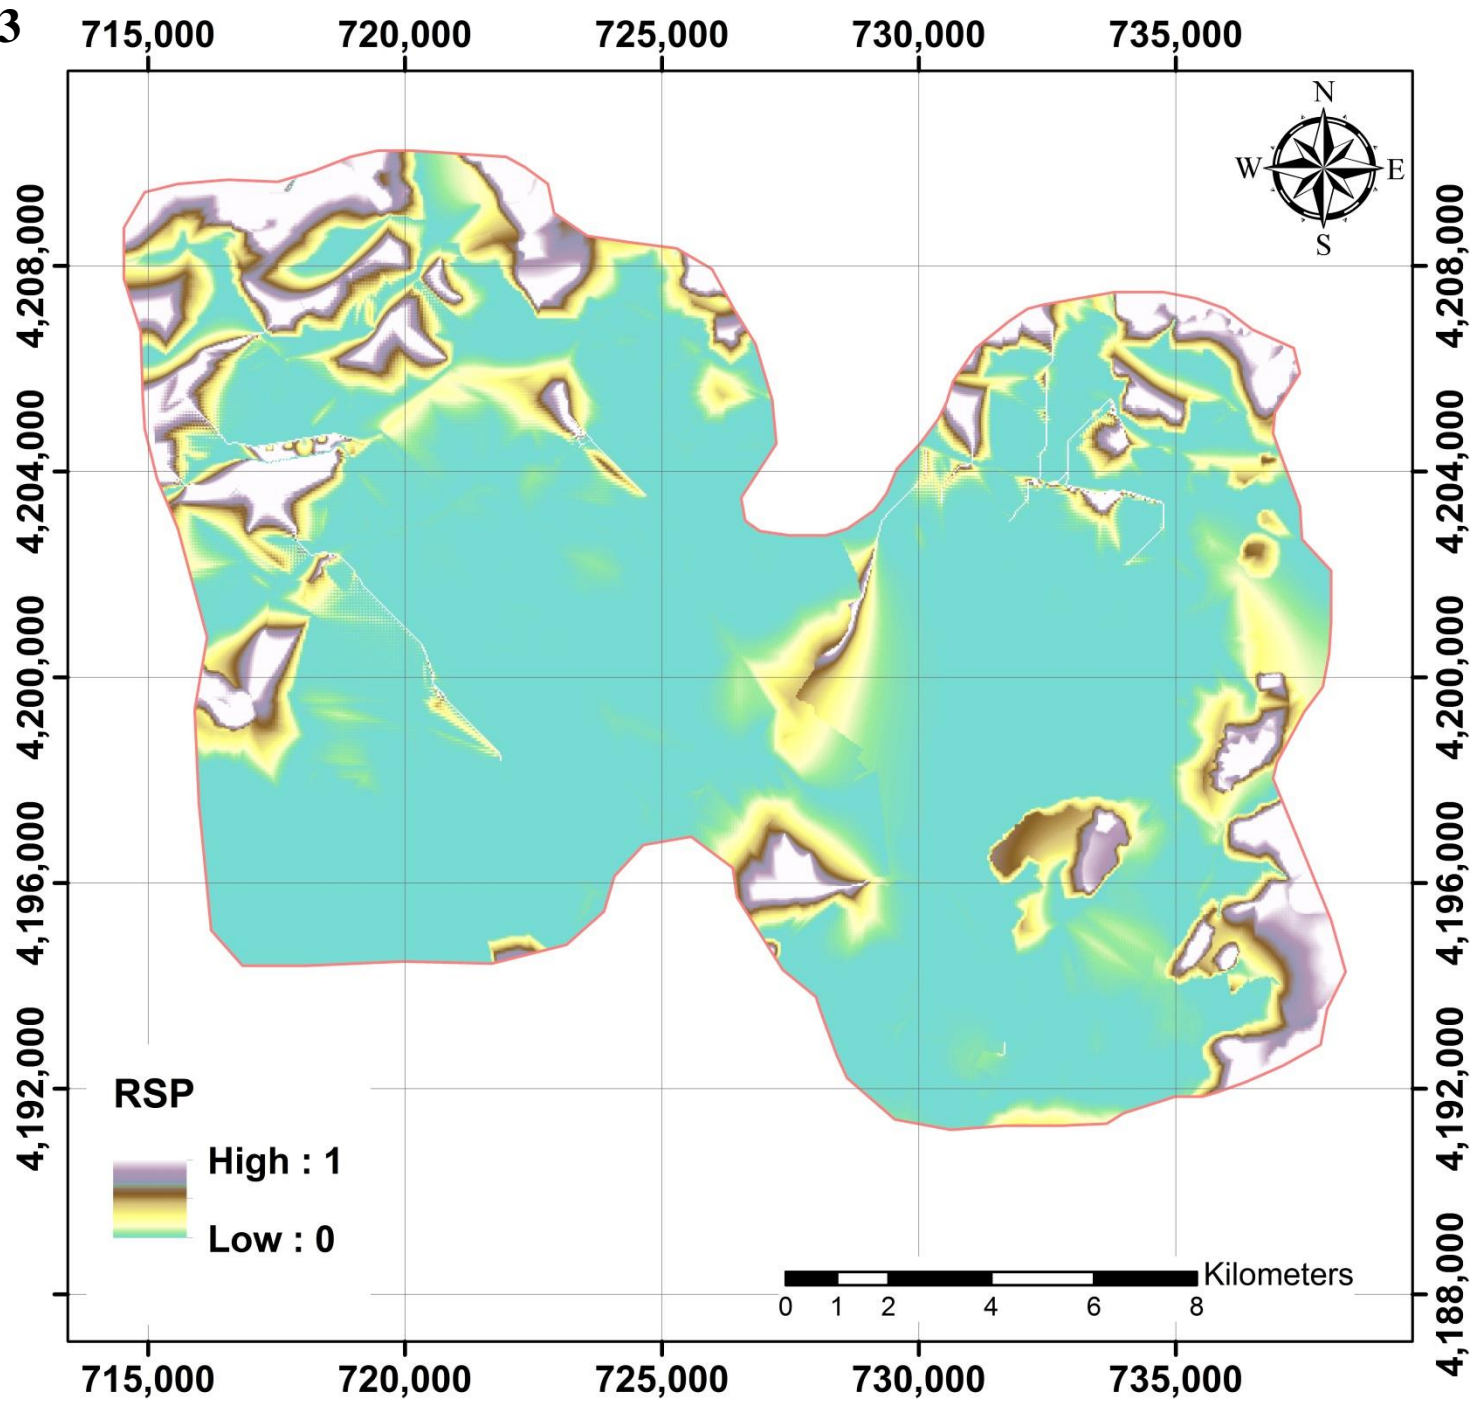

Figure S14

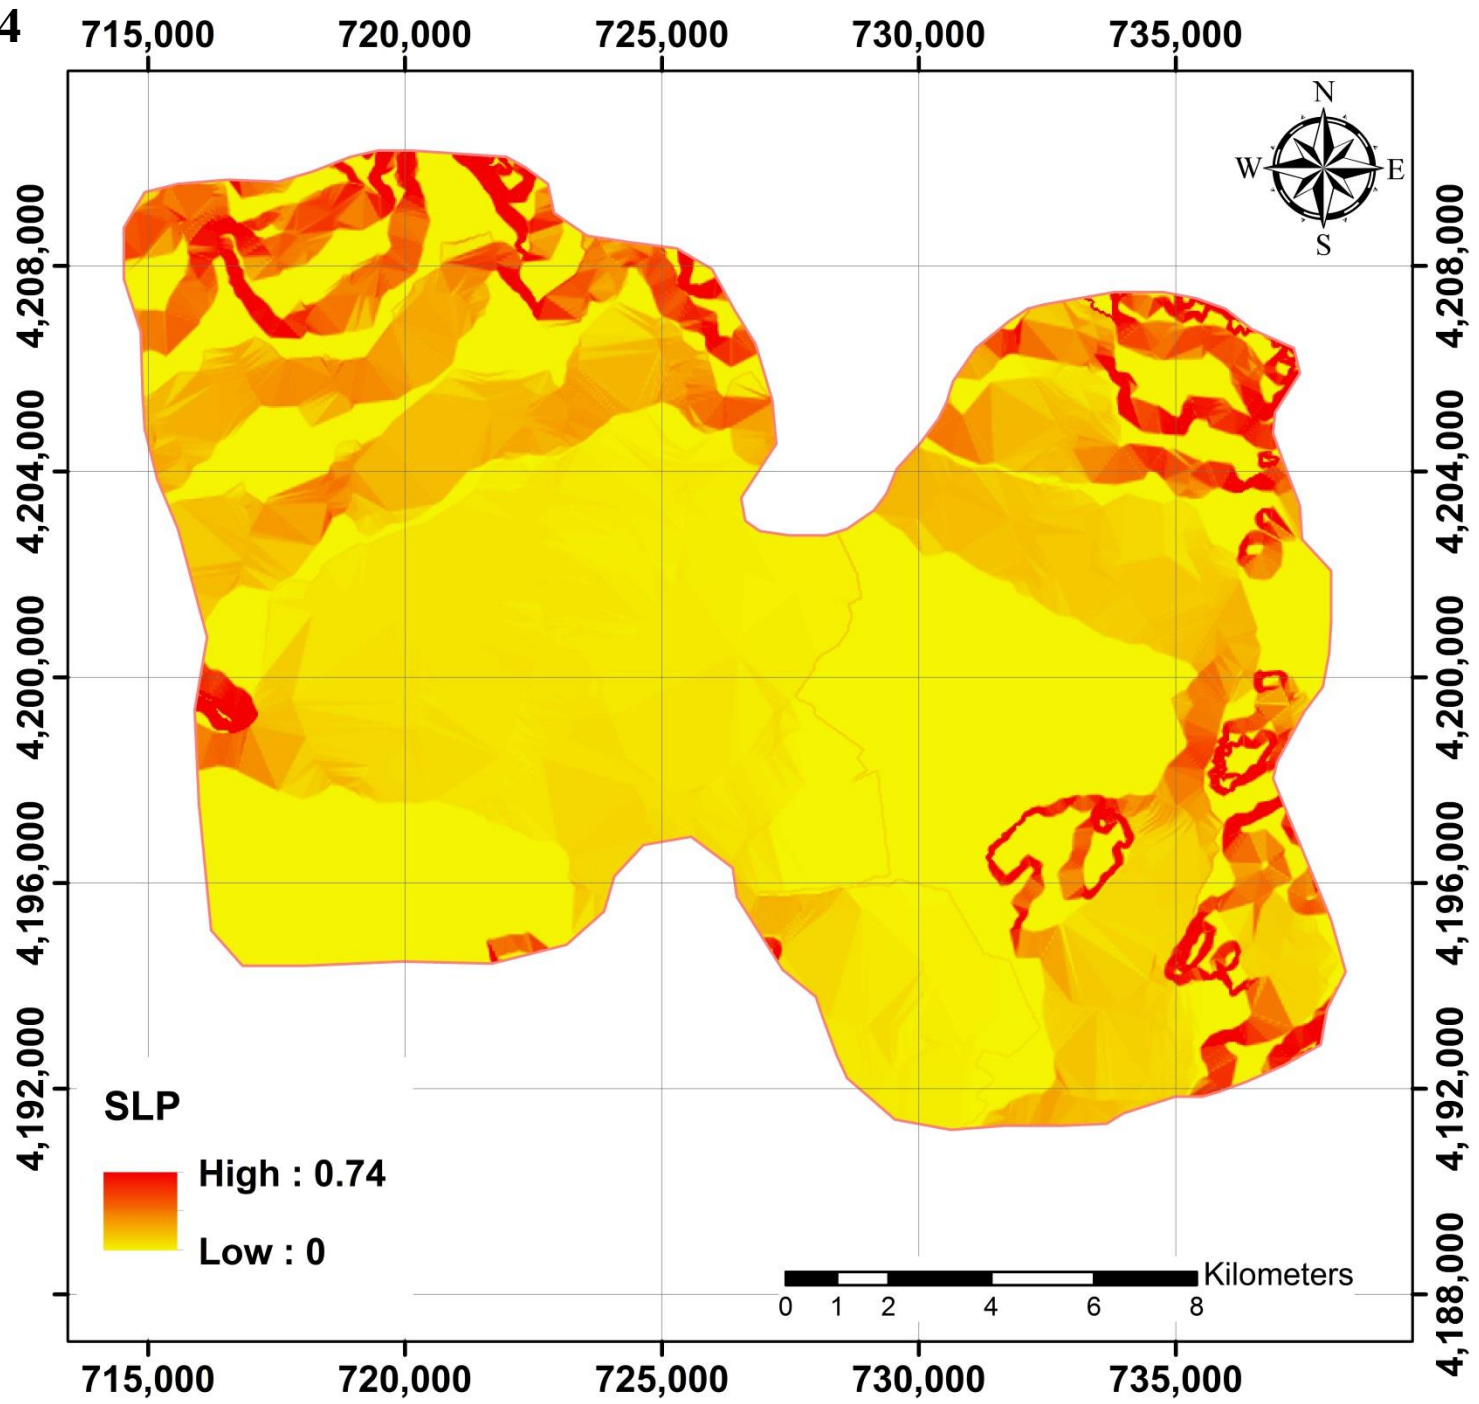

Figure S15

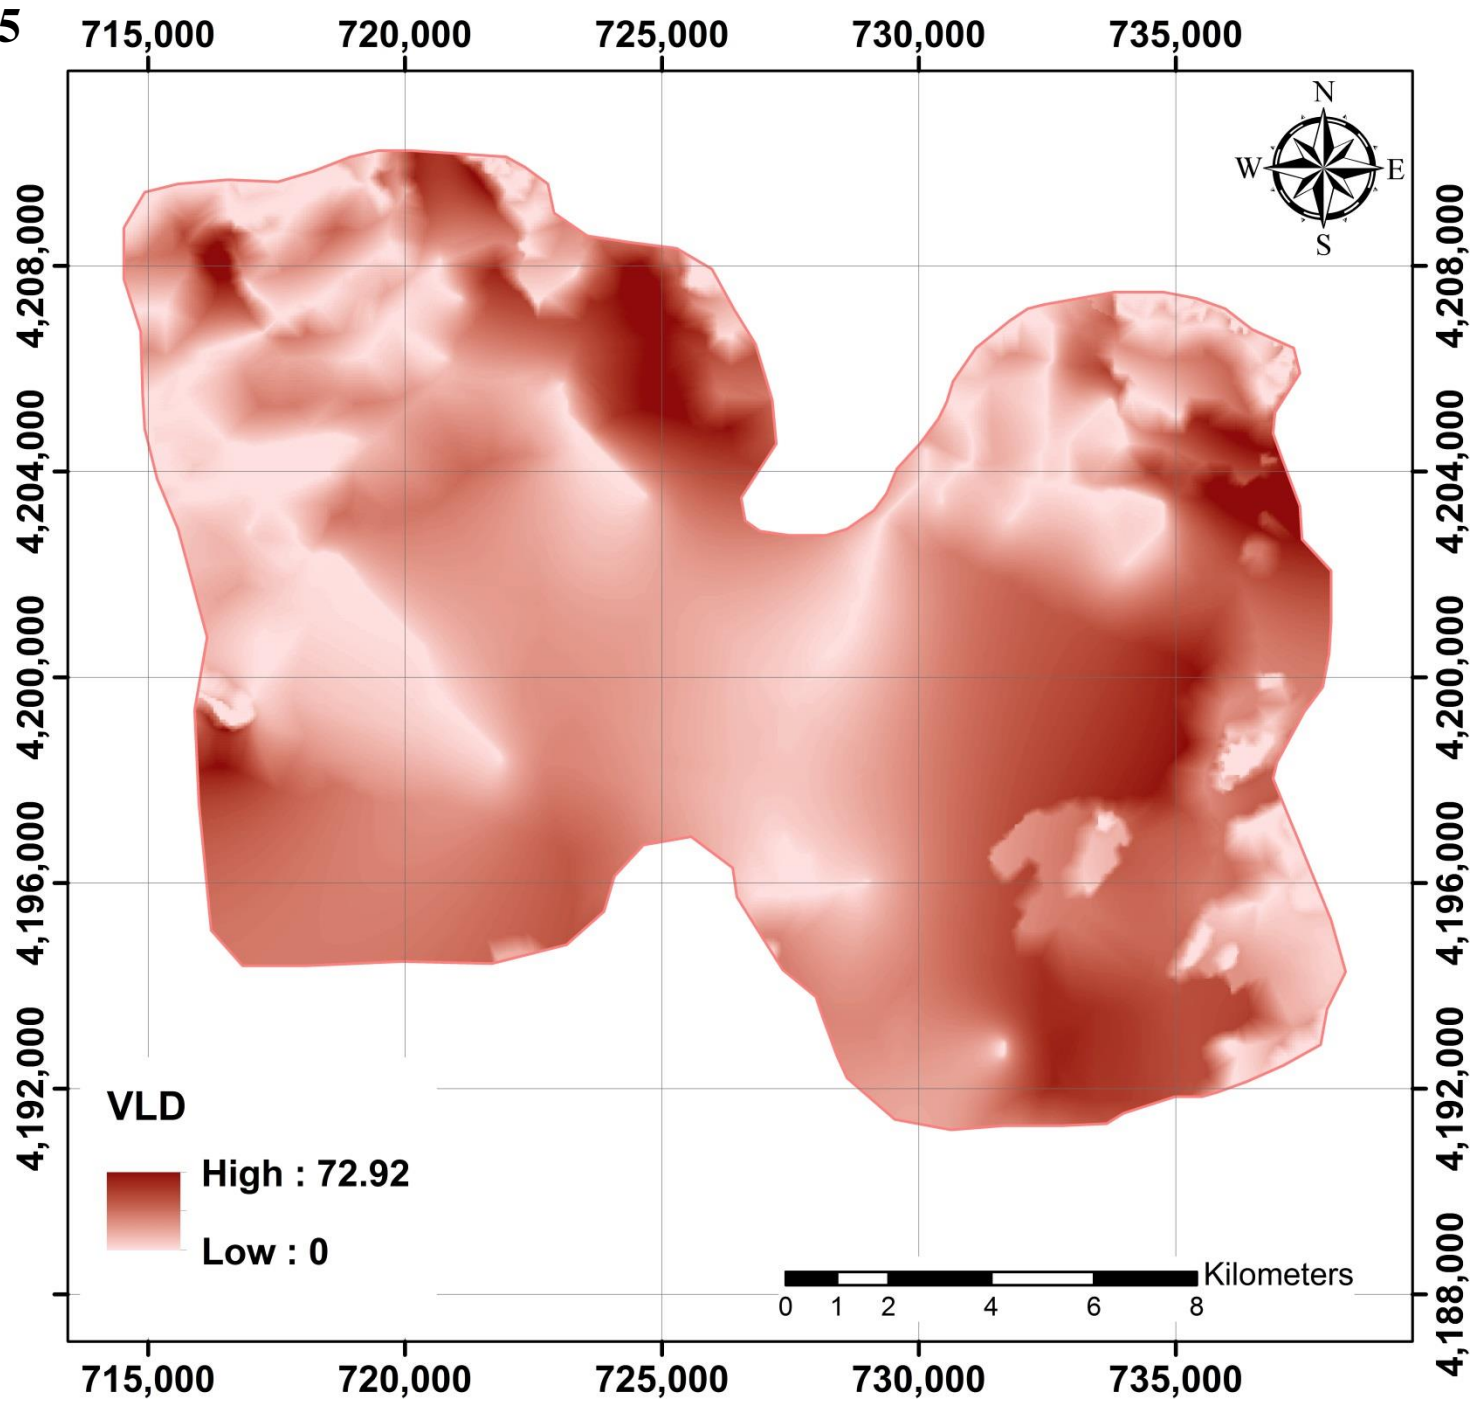

Supplement: s1 [file s1]
